# Supplementary material for: Photoinduced Bisphosphination of Alkynes with Phosphorus Interelement Compounds and Its Application to Double-Bond Isomerization
Source: MDPI journal article supplement (doi:10.3390/molecules27041284), 2022-02-14

Supplementary Materials

# Photoinduced Bisphosphination of Alkynes with Phosphorus Interelement Compounds and Its Application to Double-Bond Isomerization

Yuki Yamamoto, Ryo Tanaka, Shintaro Kodama, Akihiro Nomoto and Akiya Ogawa \*

Department of Applied Chemistry, Graduate School of Engineering, Osaka Prefecture University,  
Osaka 599-8531, Japan; syb02137@edu.osakafu-u.ac.jp (Y.Y.); sab02088@edu.osakafu-u.ac.jp (R.T.);  
skodama@chem.osakafu-u.ac.jp (S.K.); nomoto@chem.osakafu-u.ac.jp (A.N.)

\* Correspondence: ogawa@chem.osakafu-u.ac.jp (A.O.)

## Contents

Copies of  $^1\text{H}$ ,  $^{13}\text{C}\{^1\text{H}\}$ , and  $^{31}\text{P}$  NMR spectra ···2–25

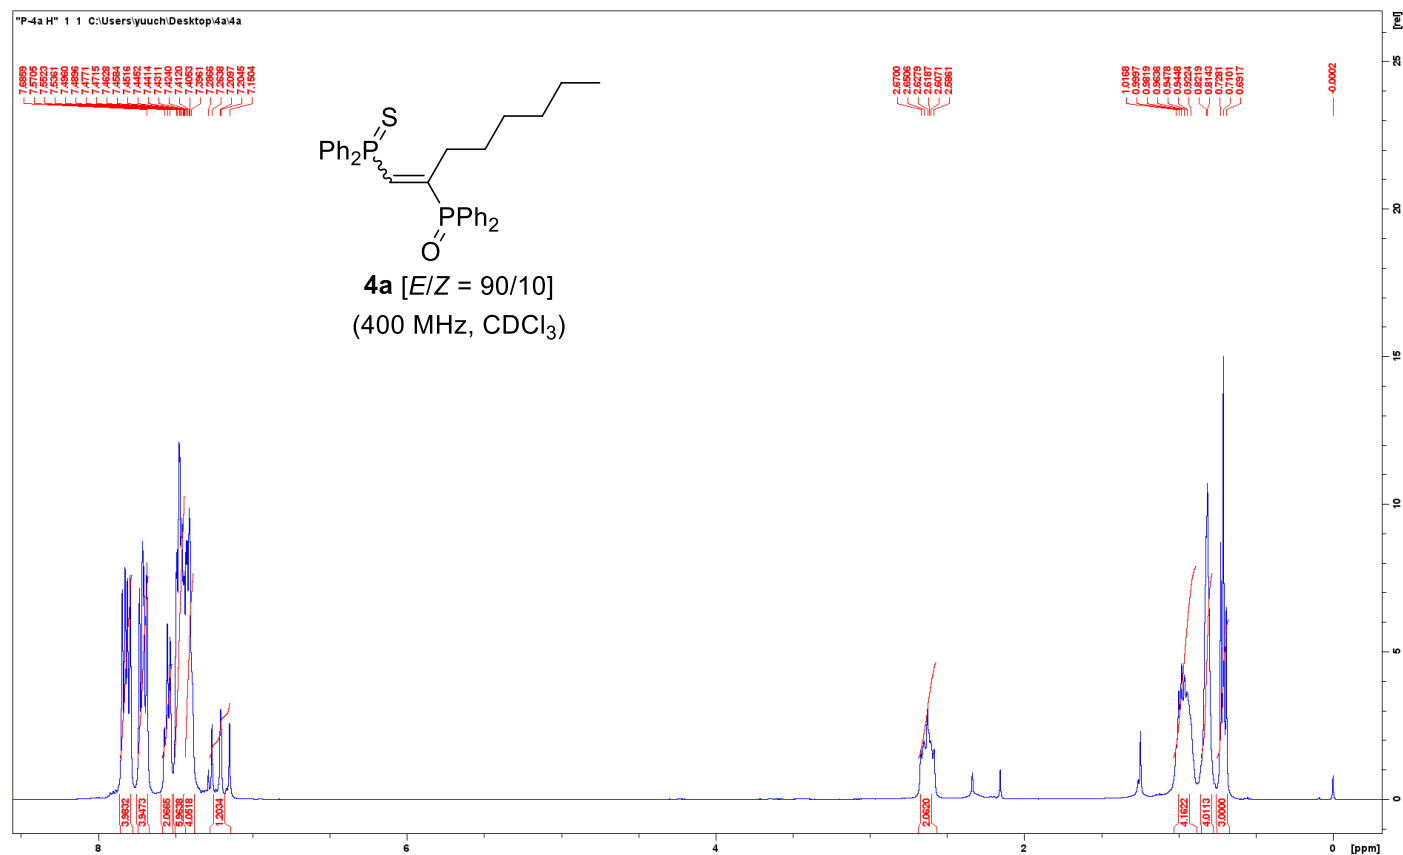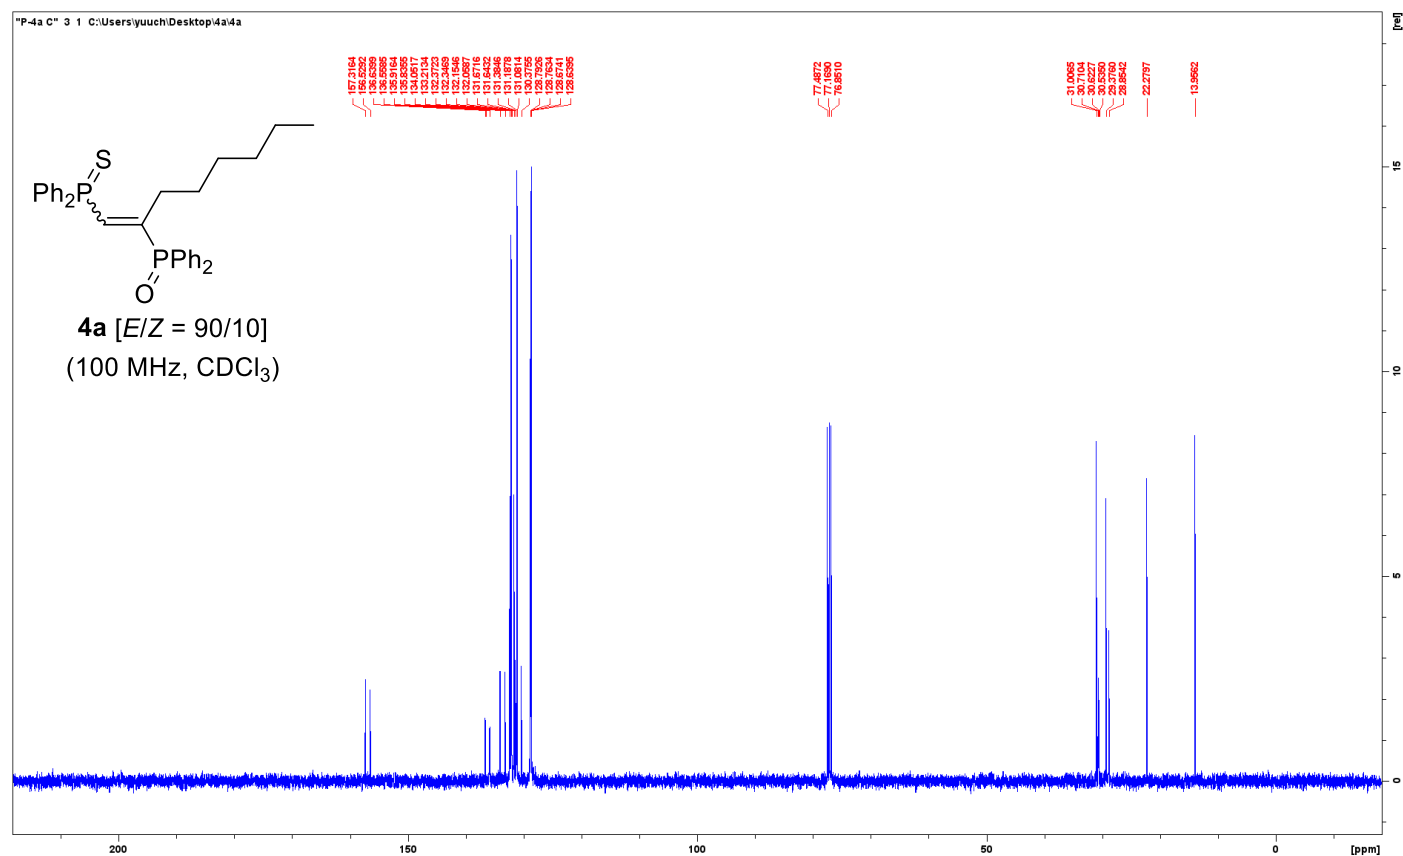

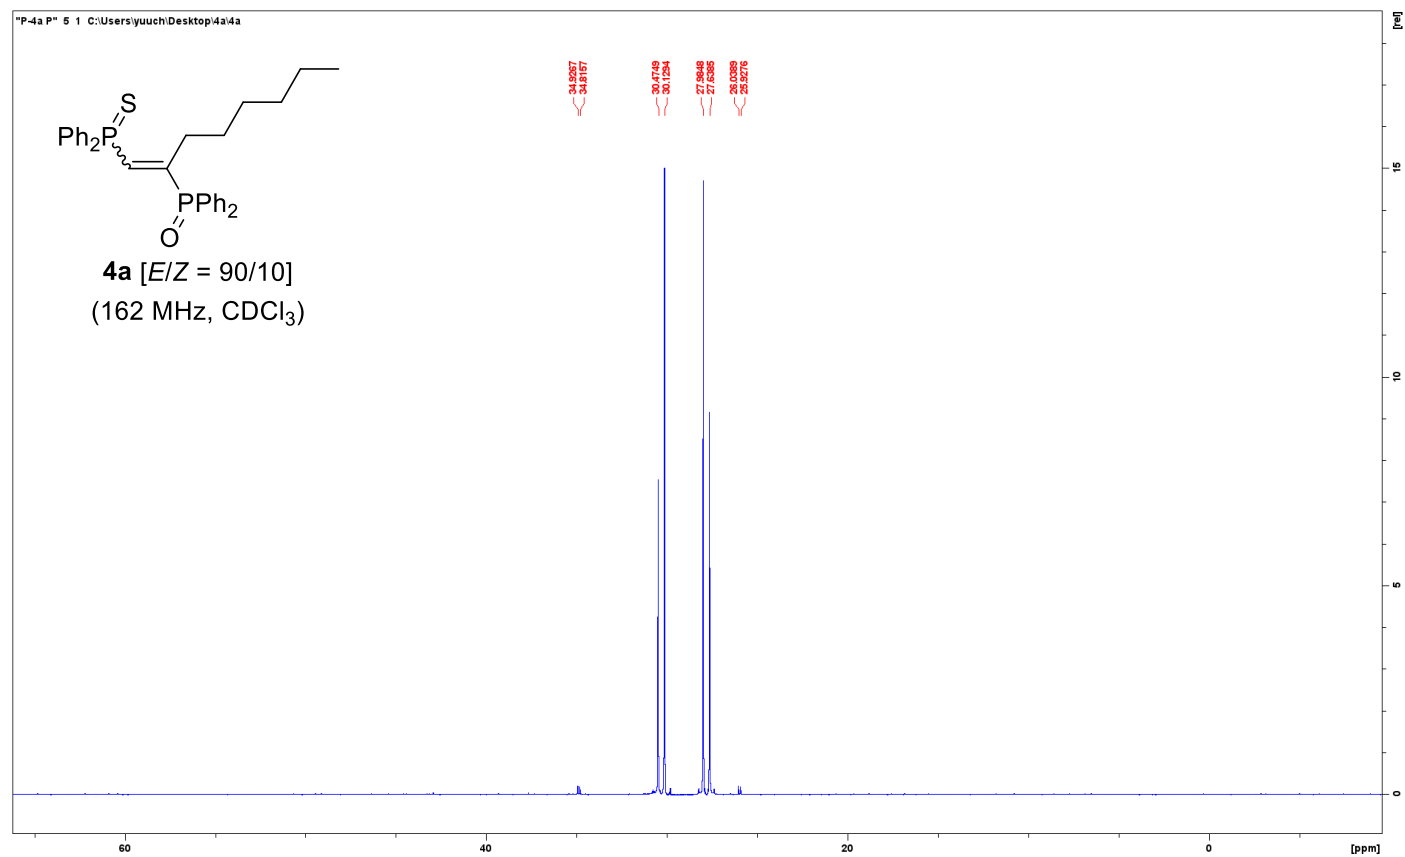



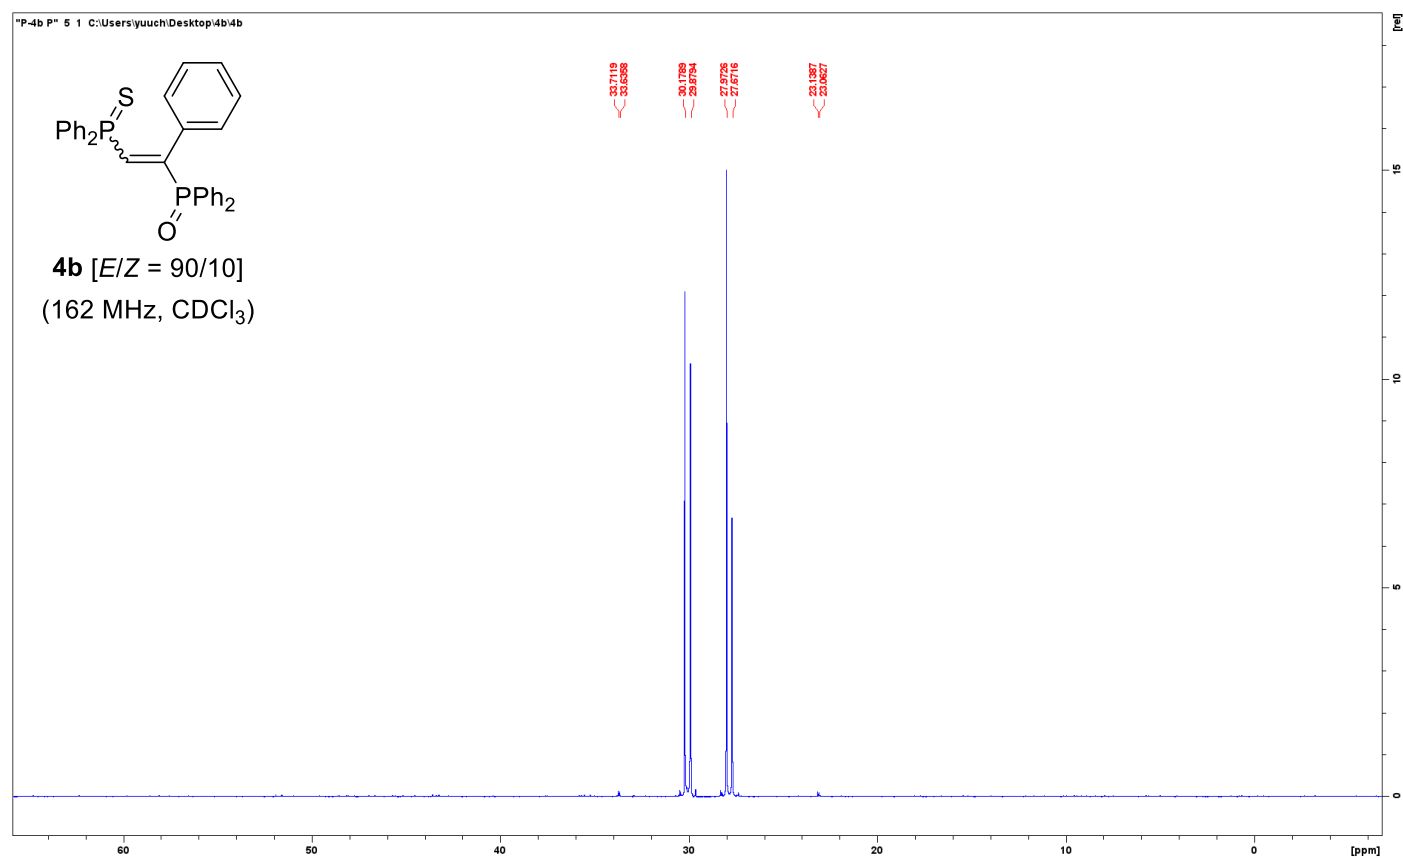

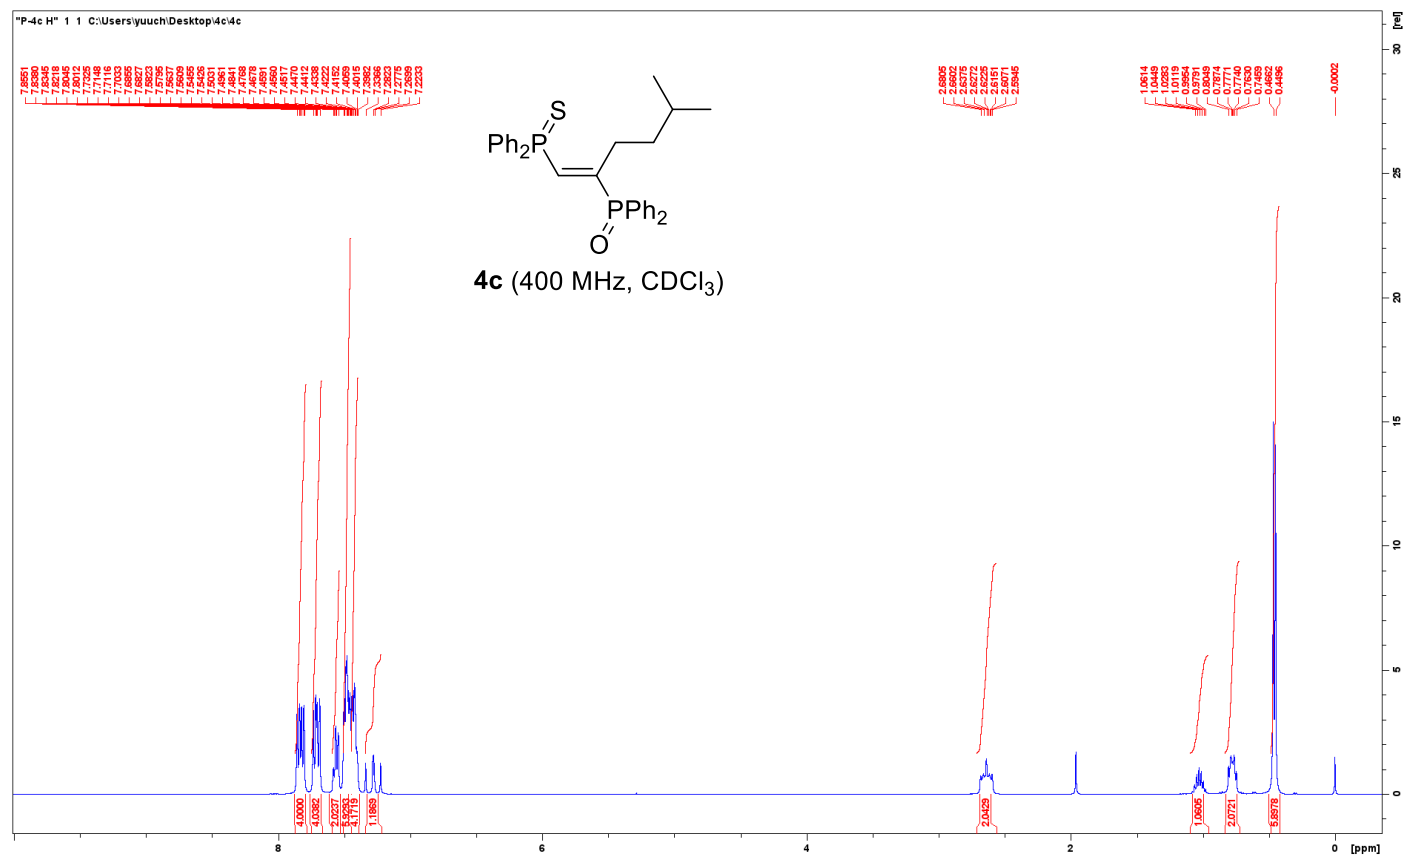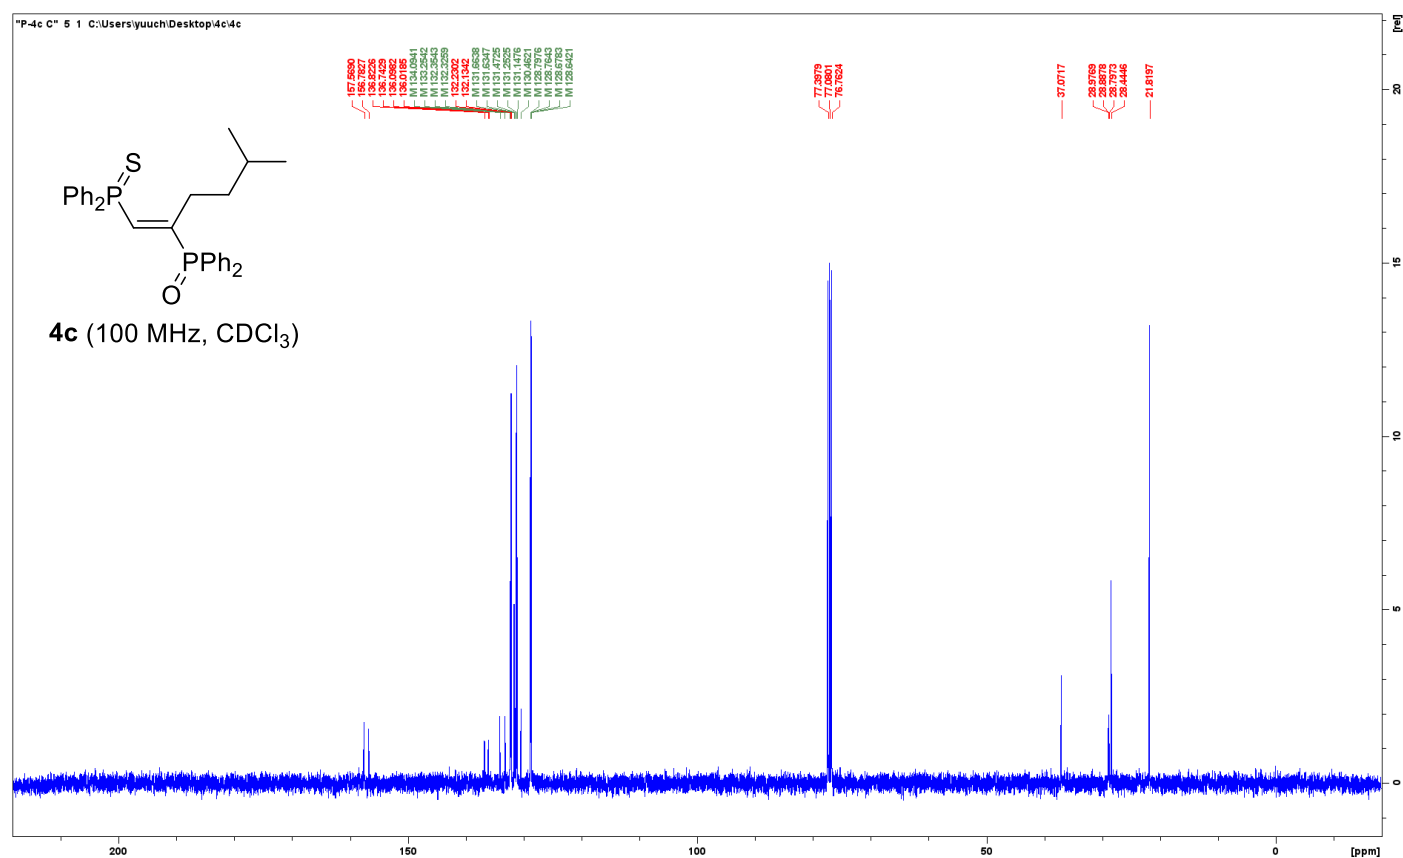

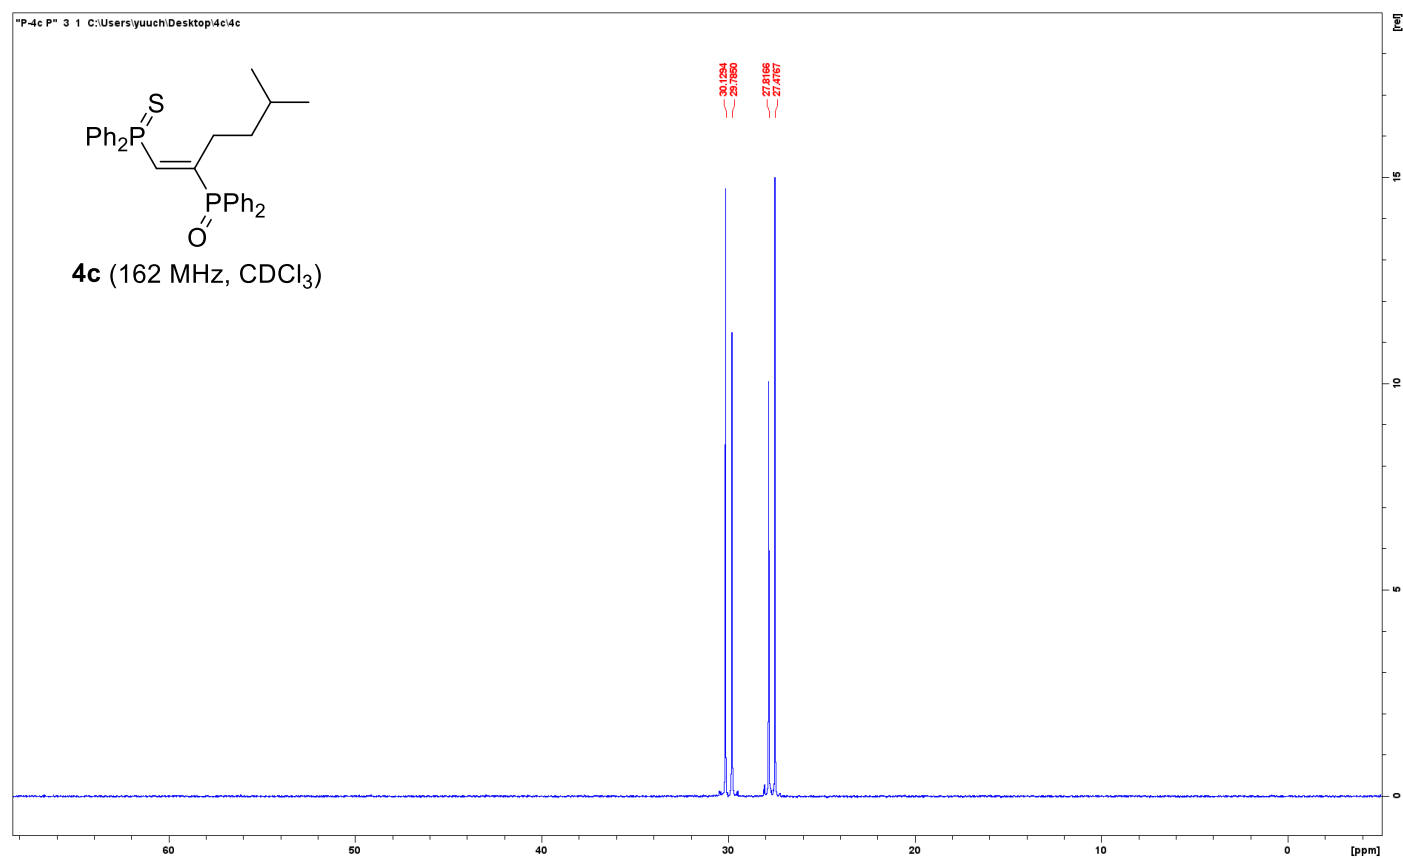





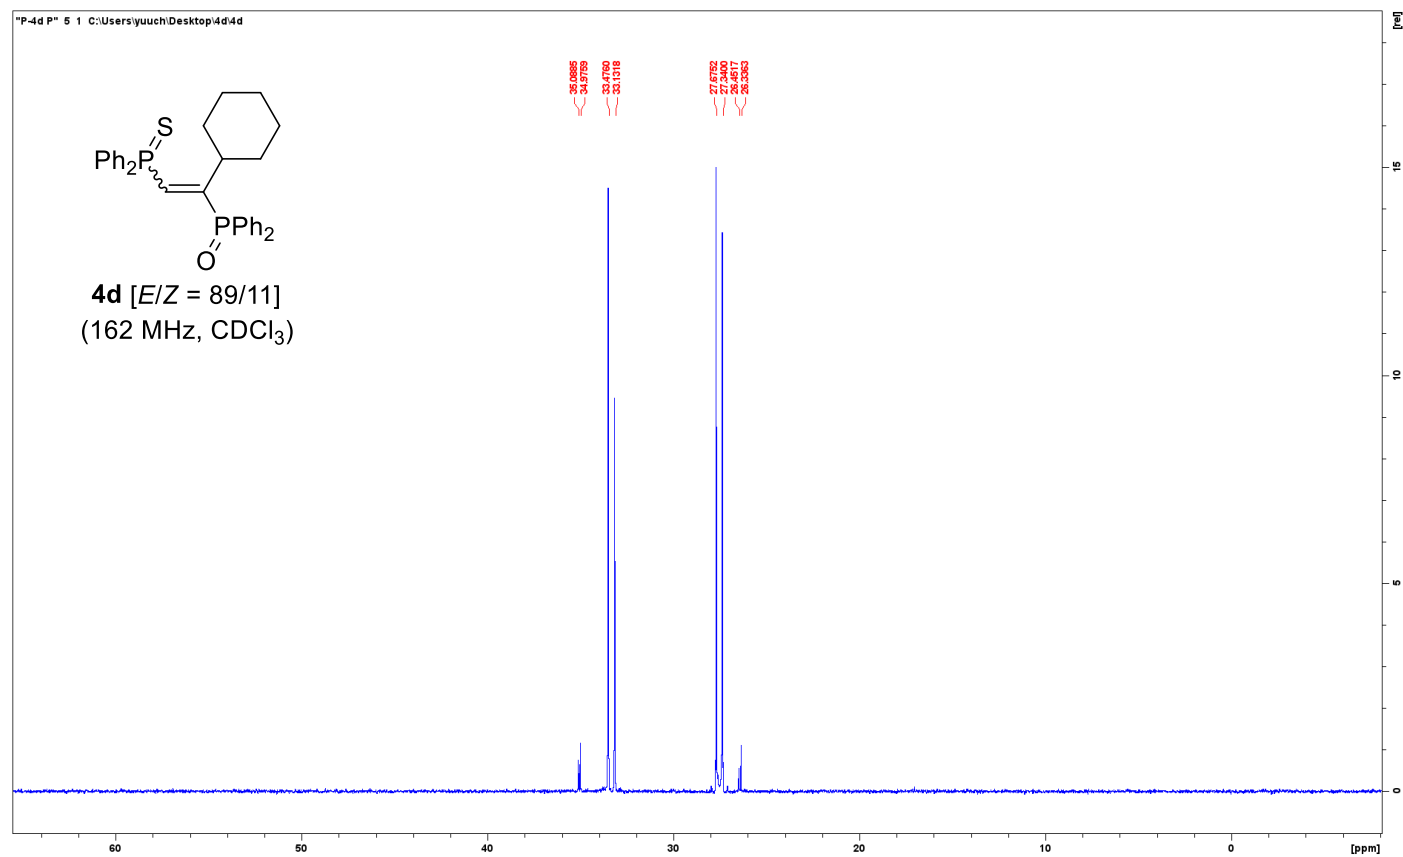

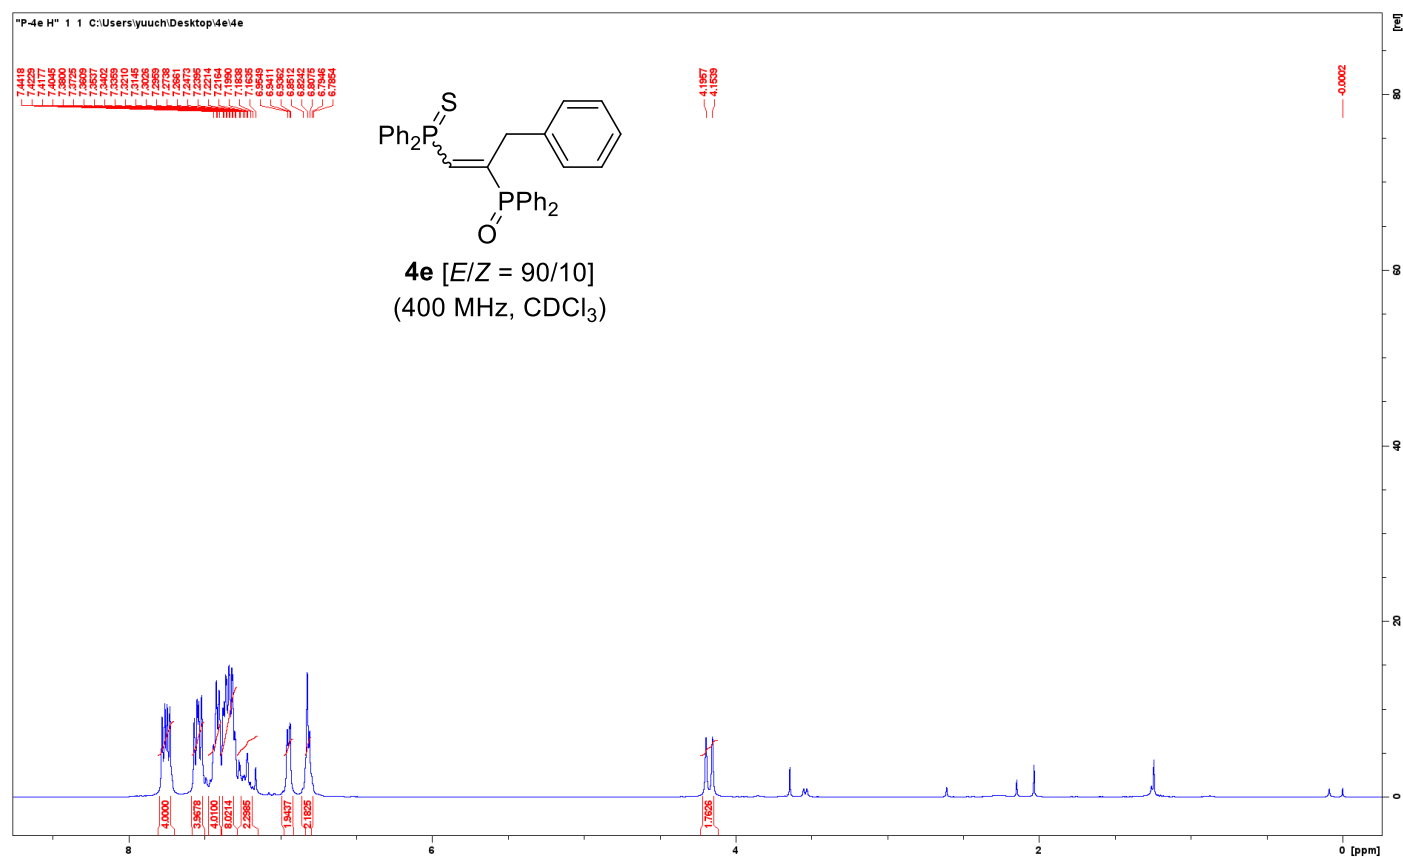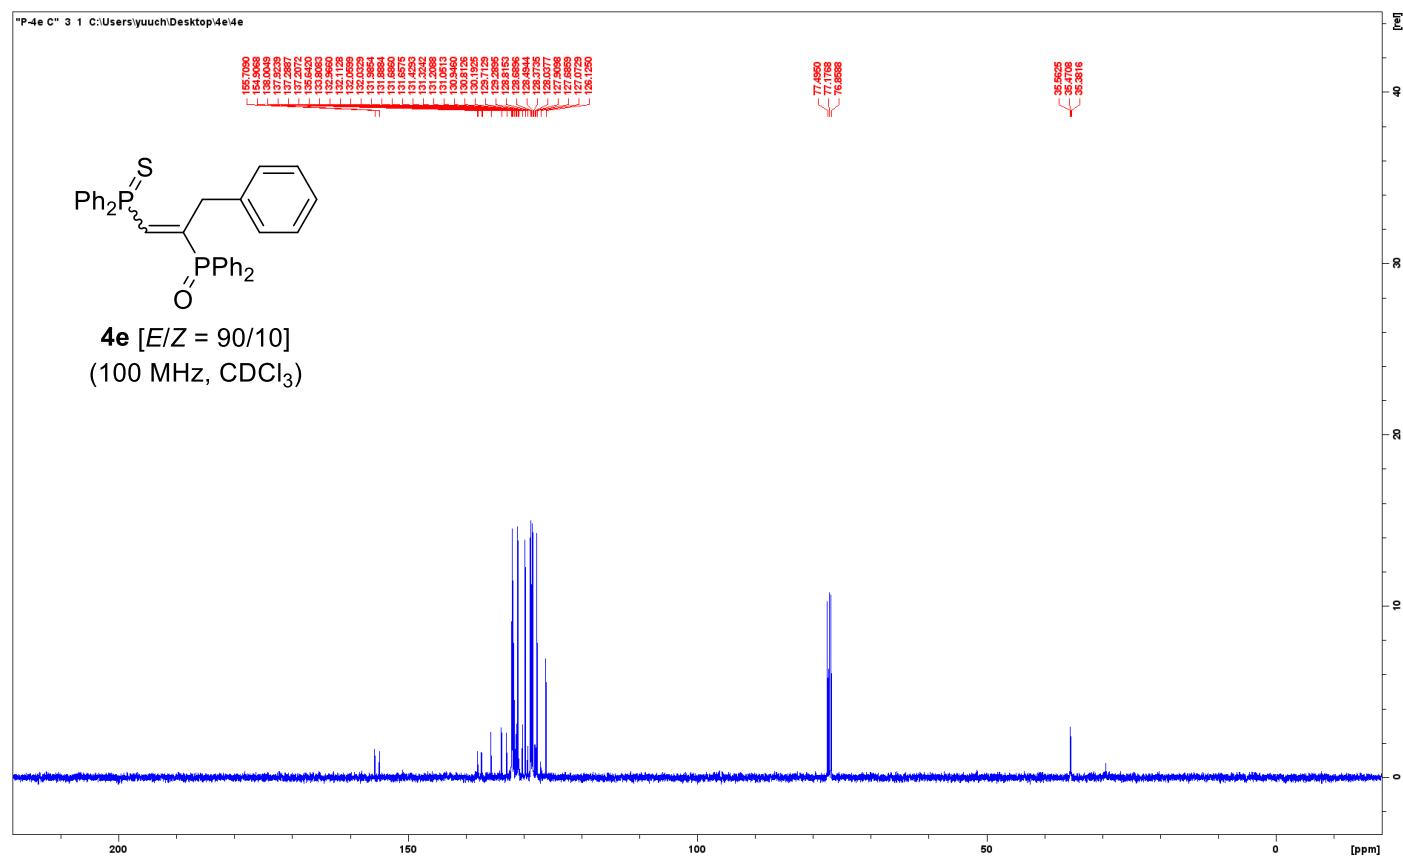

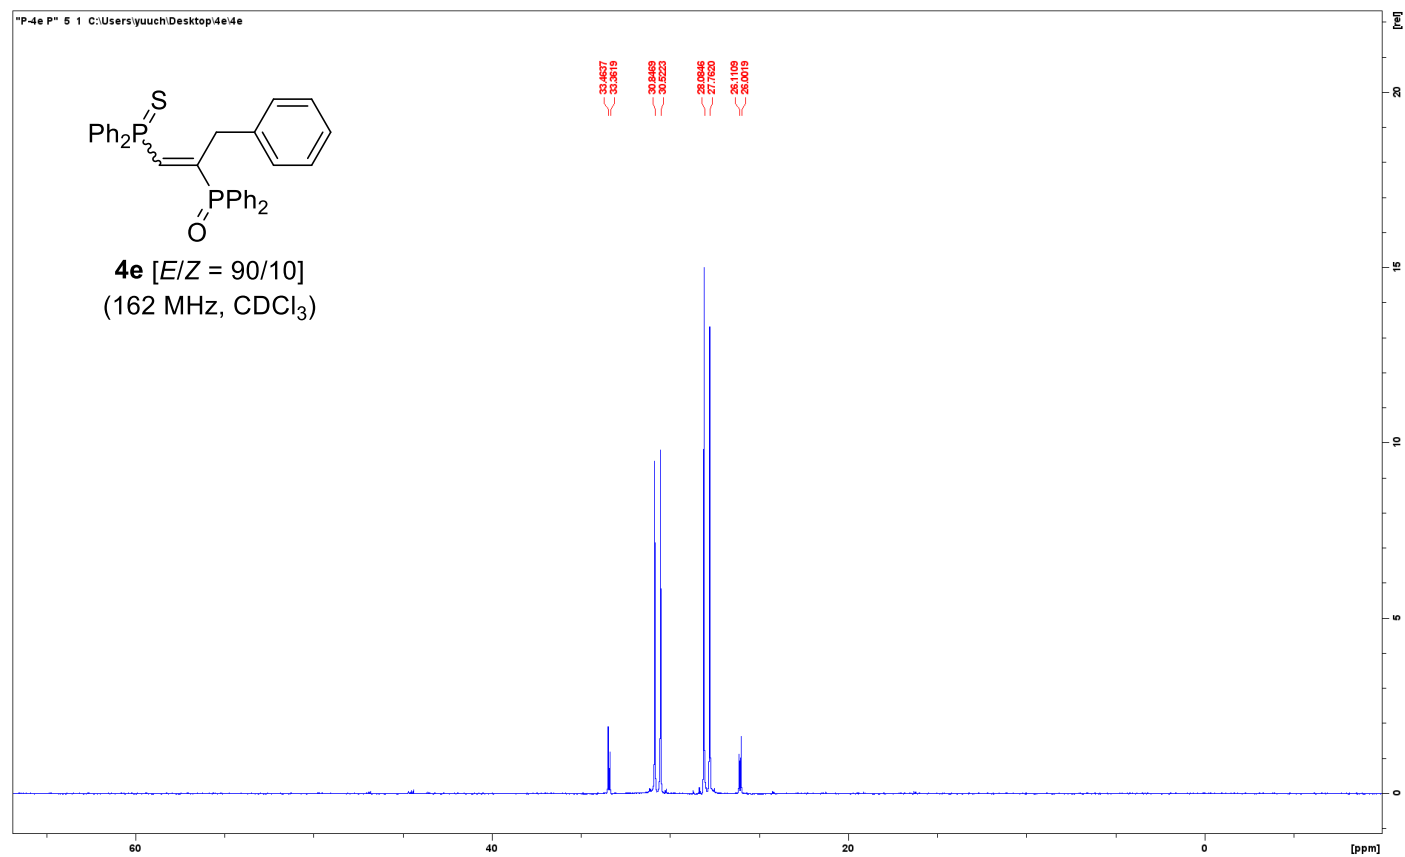

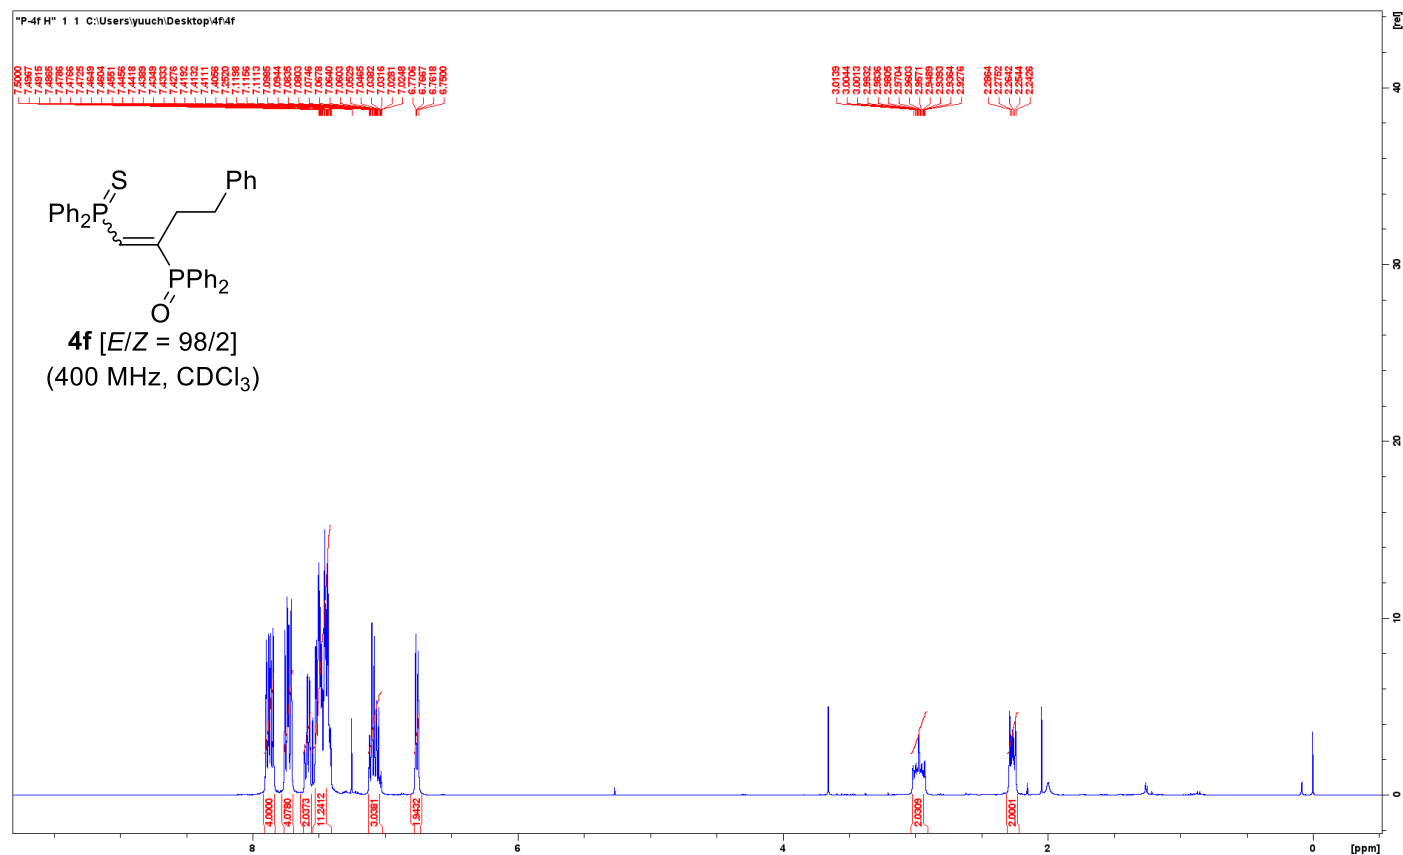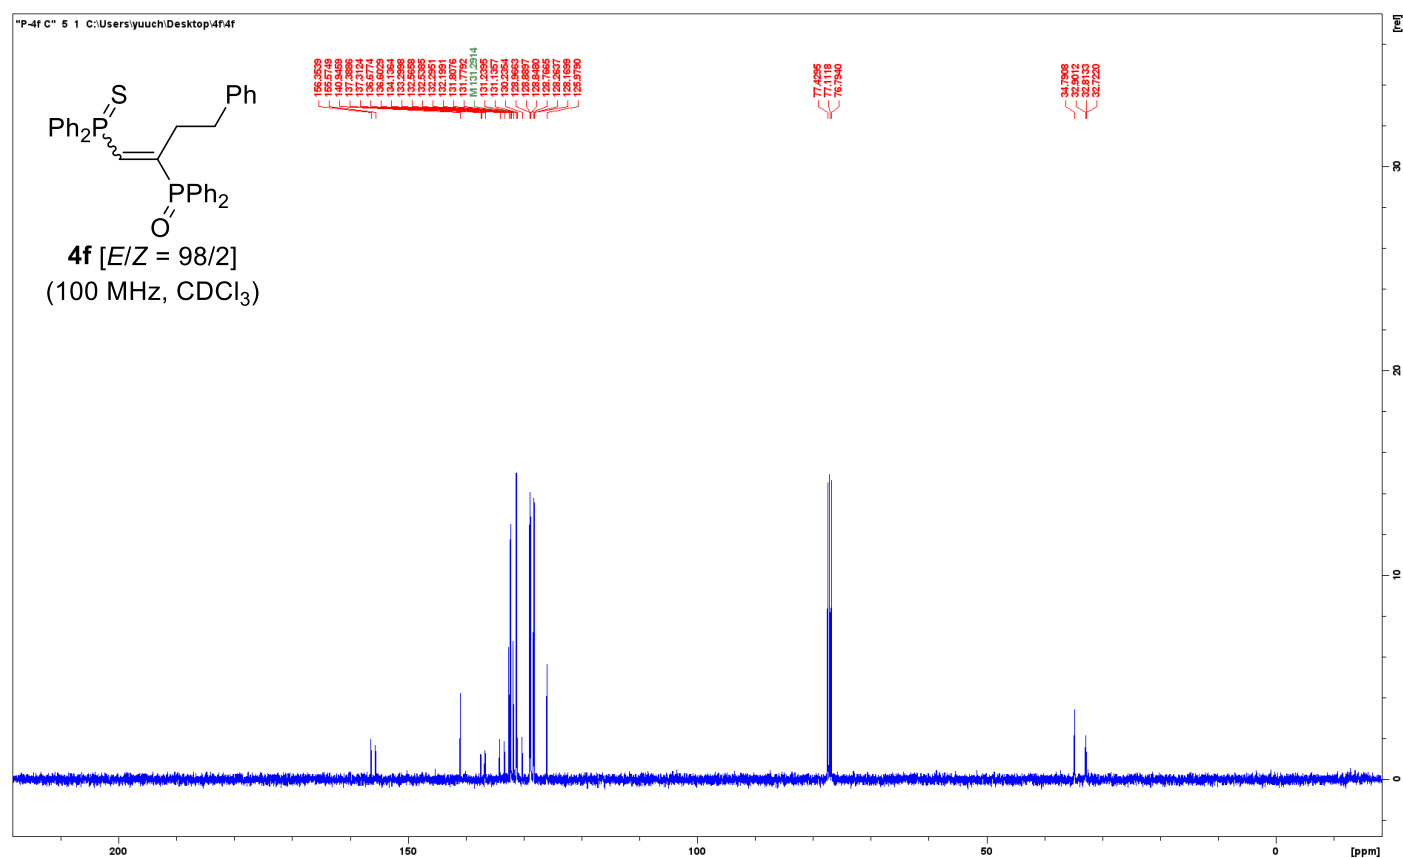

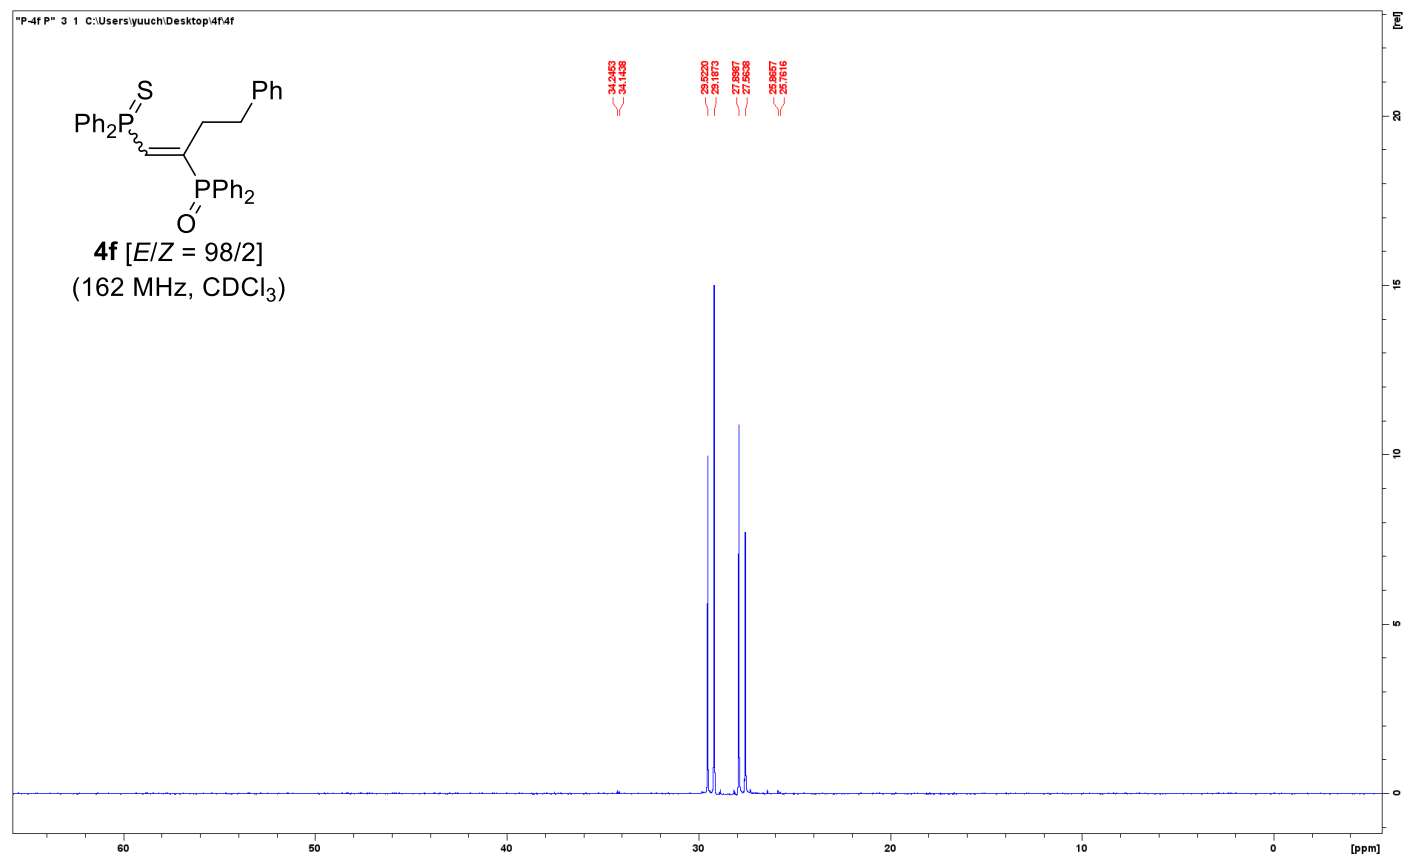



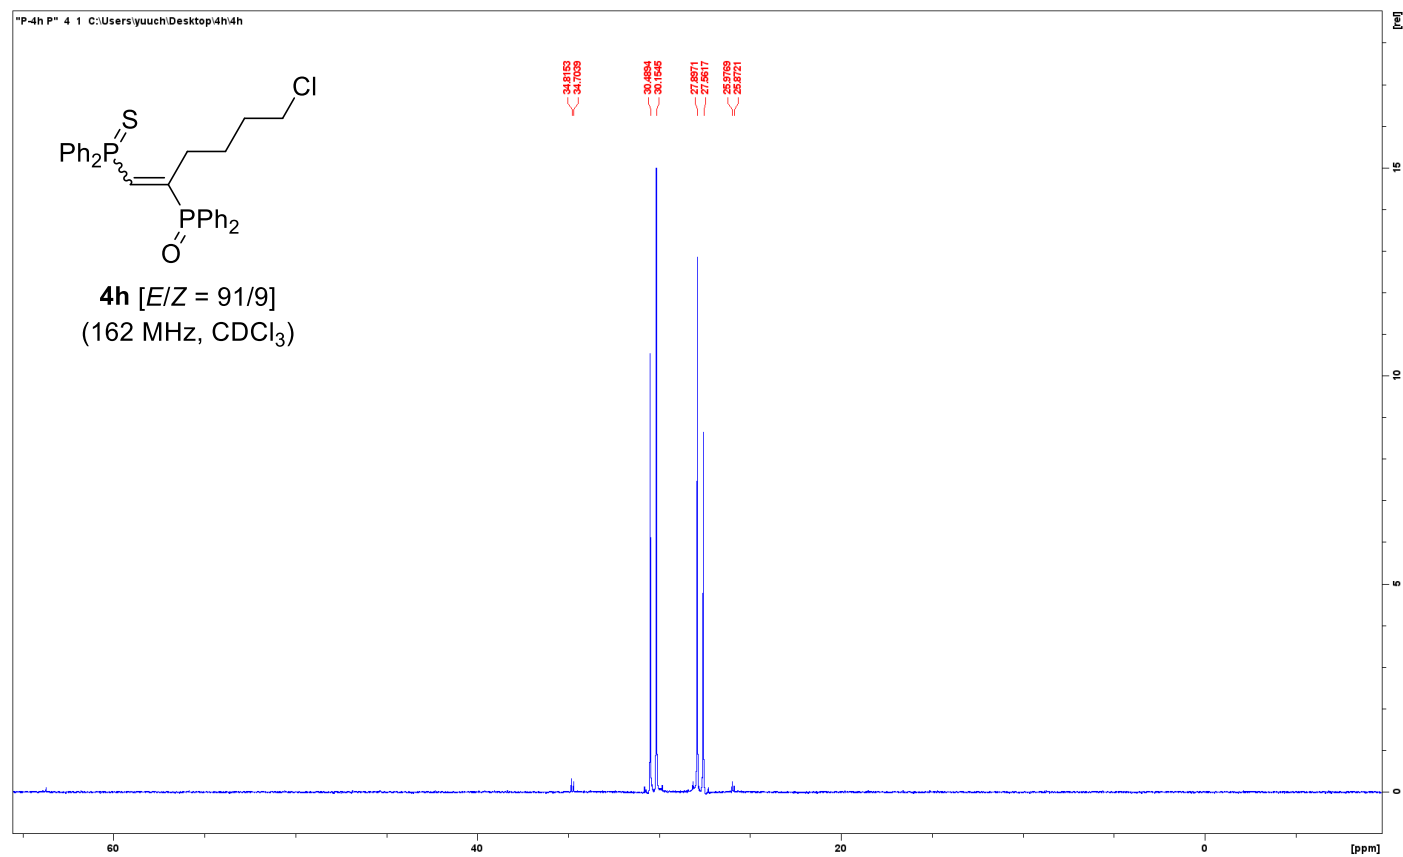

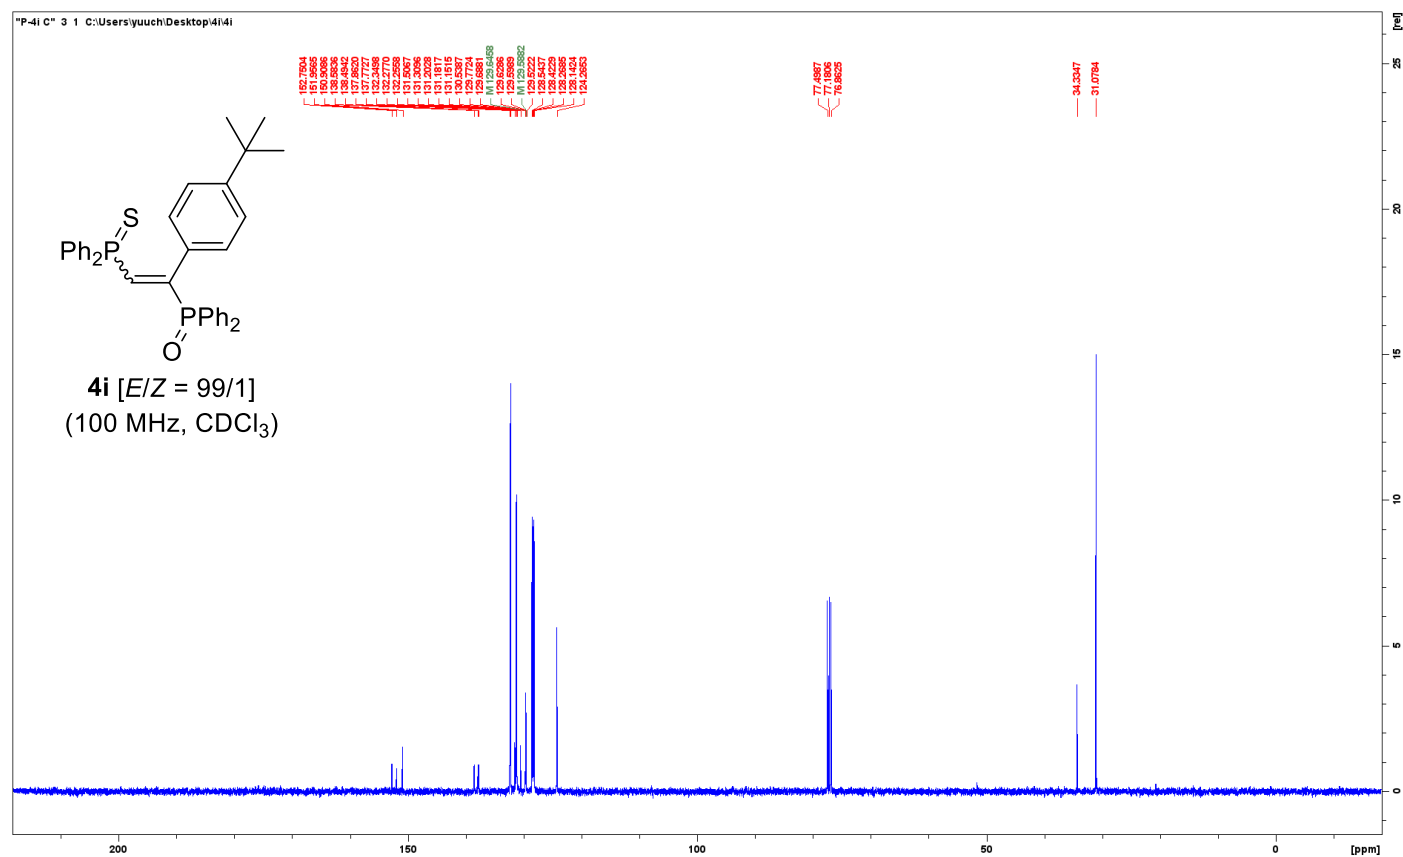



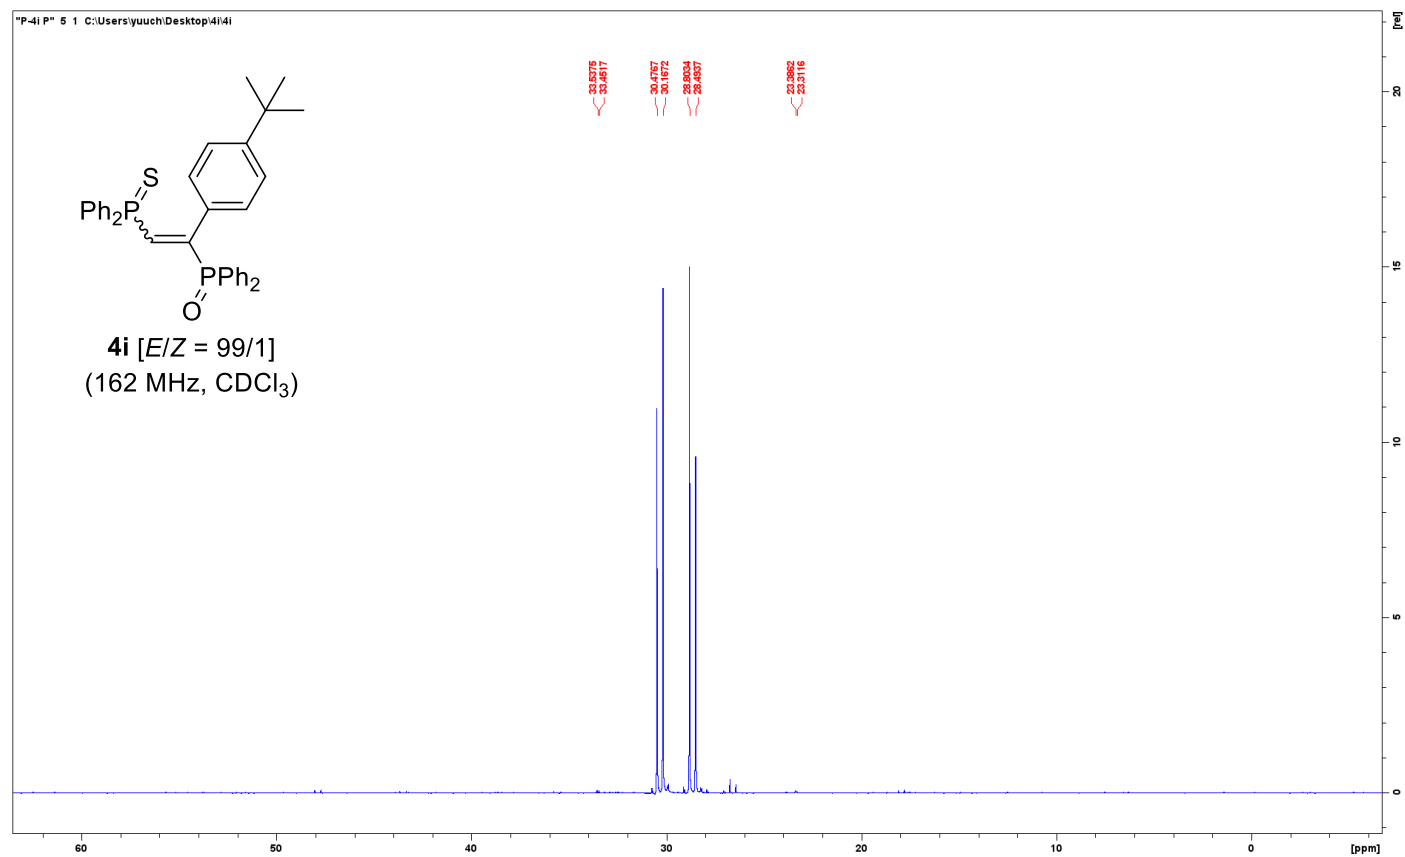

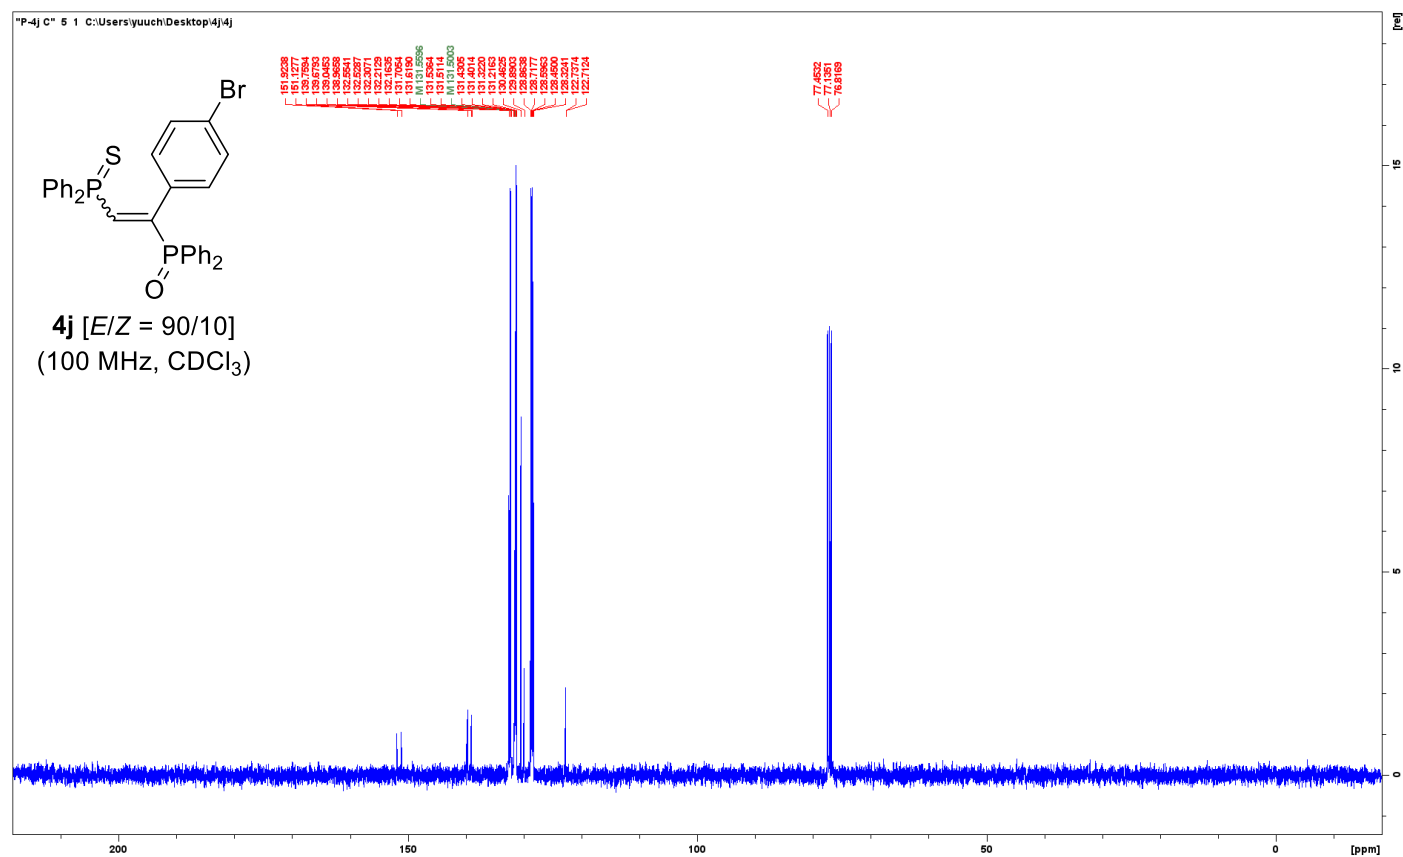

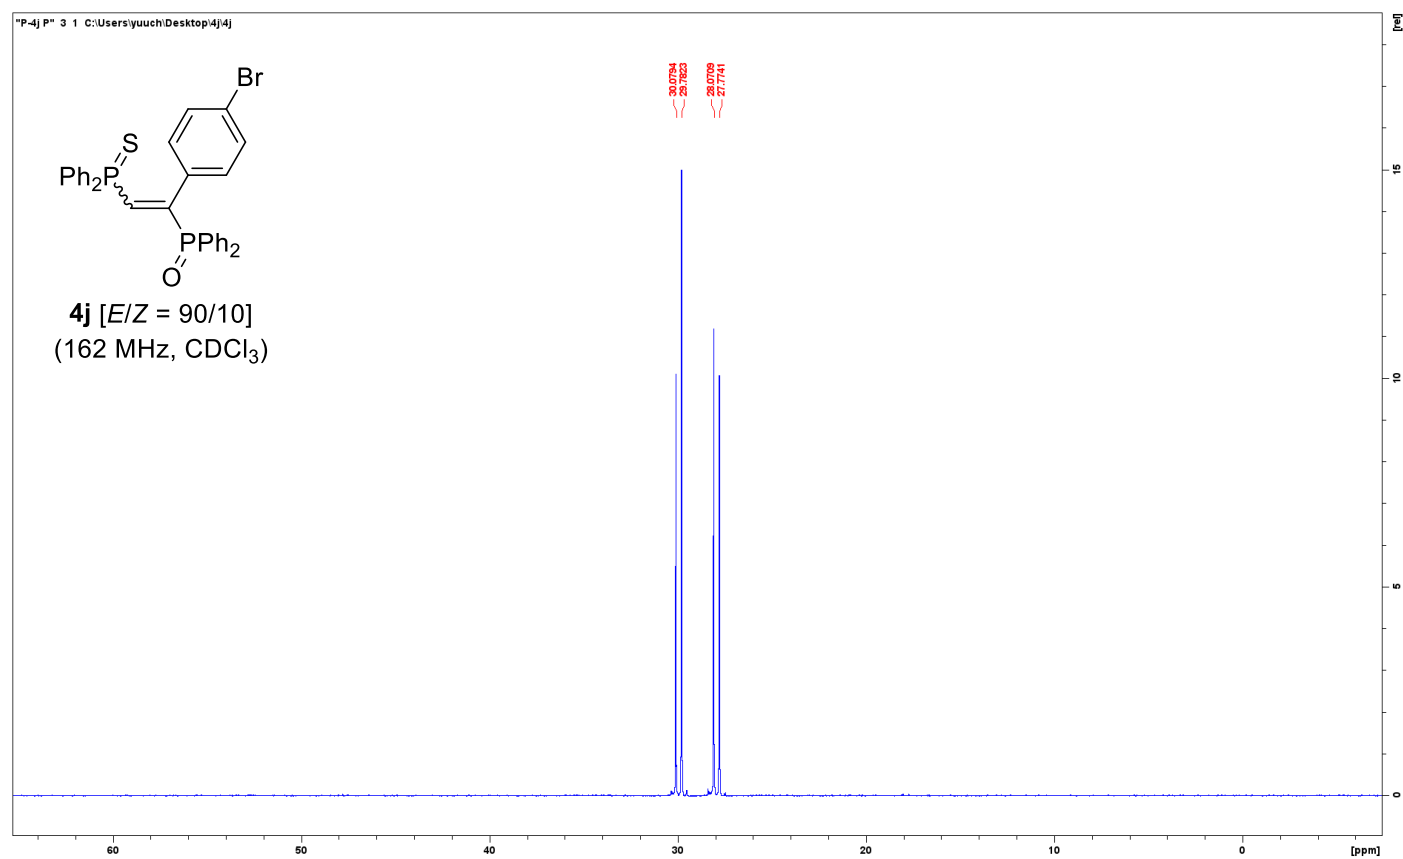



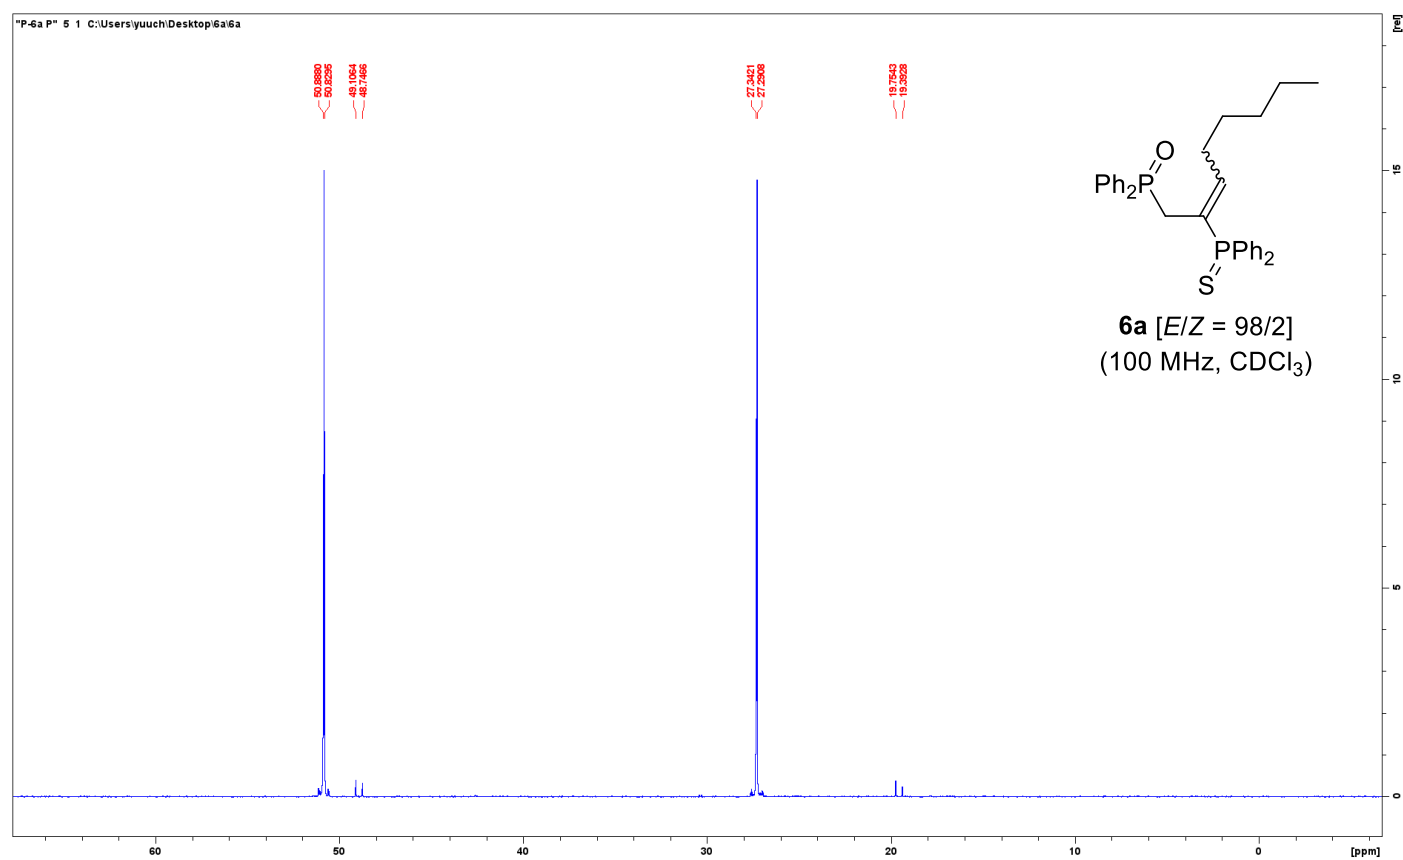



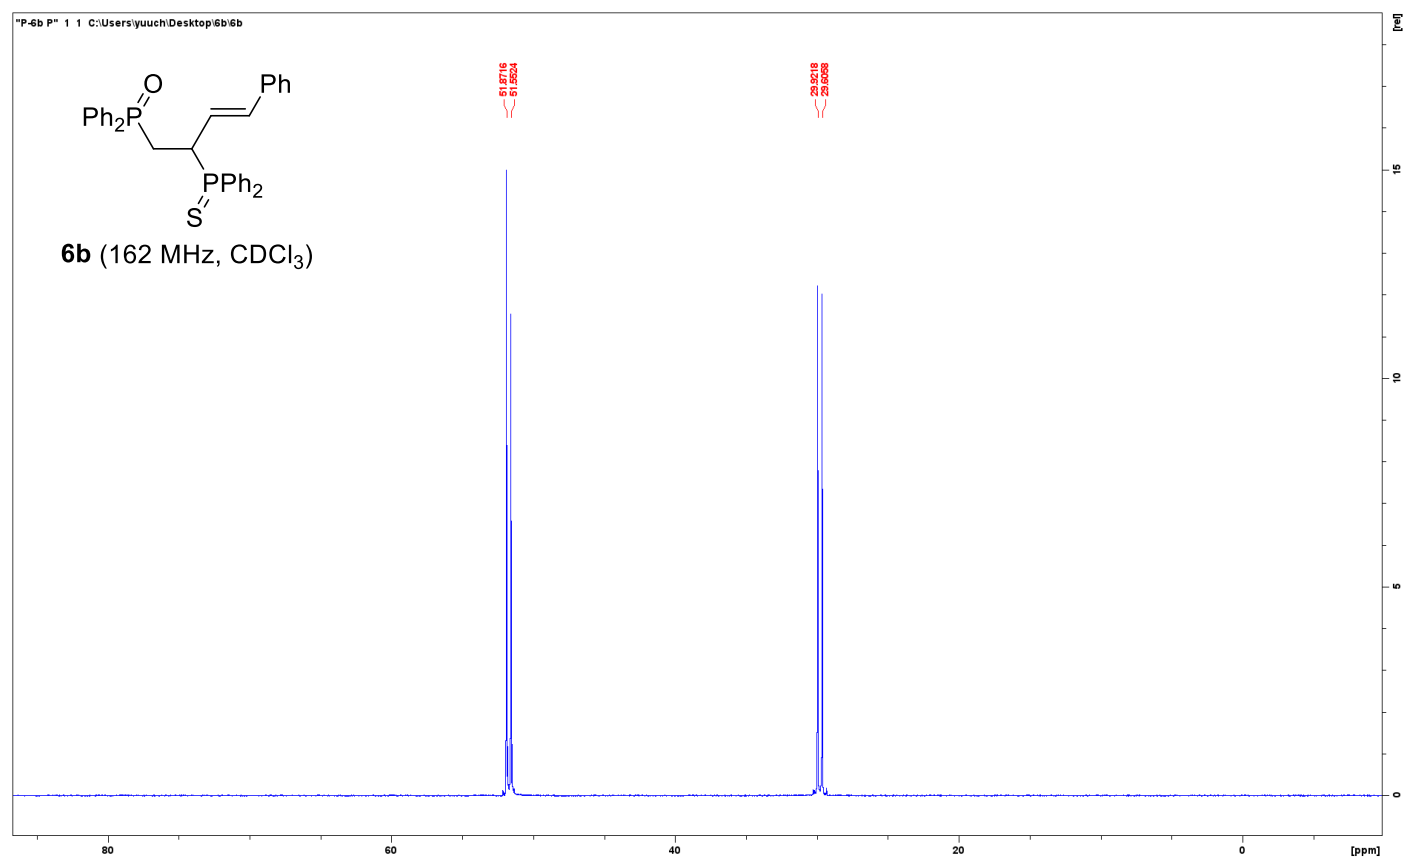

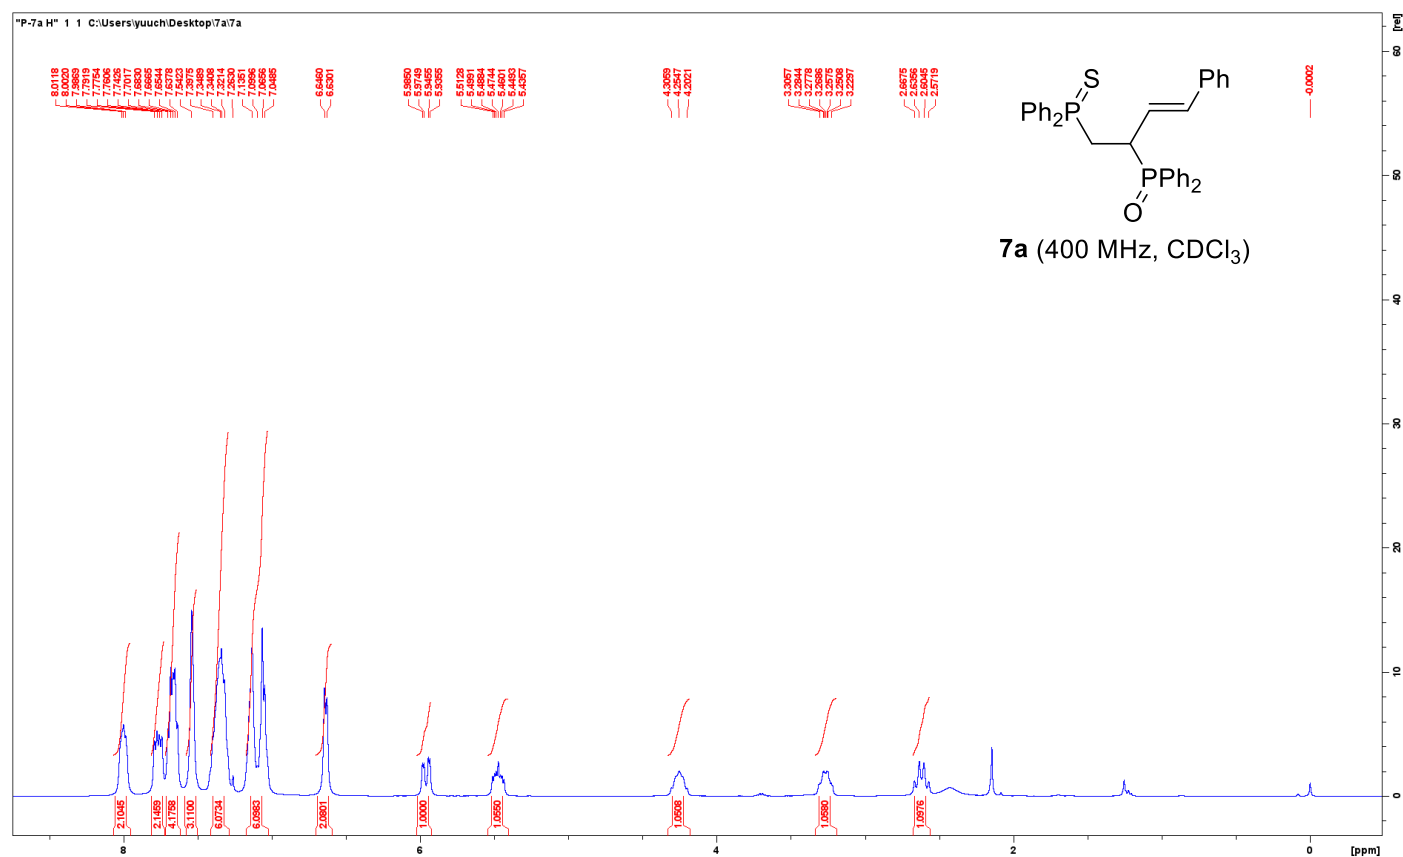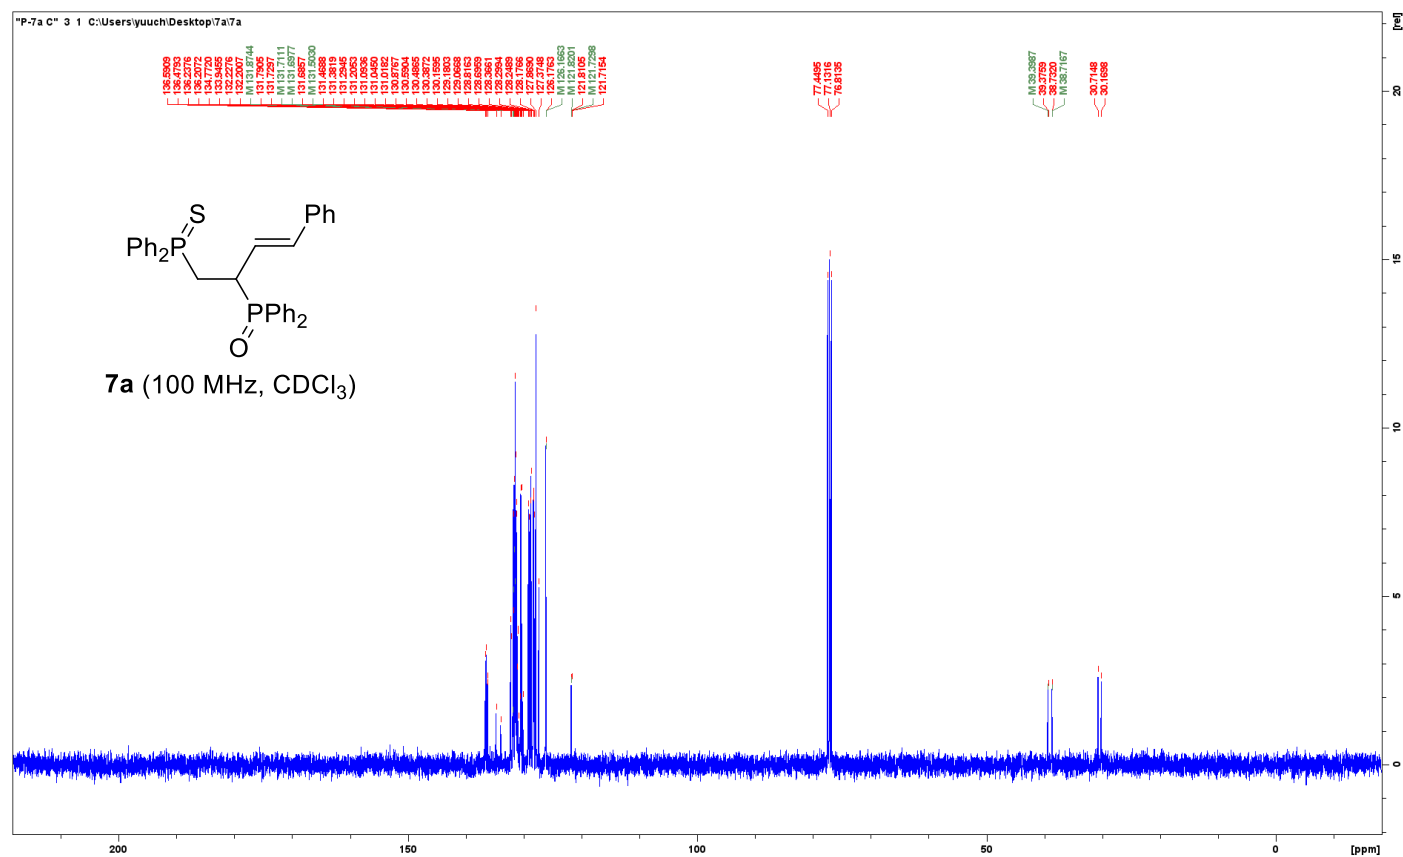



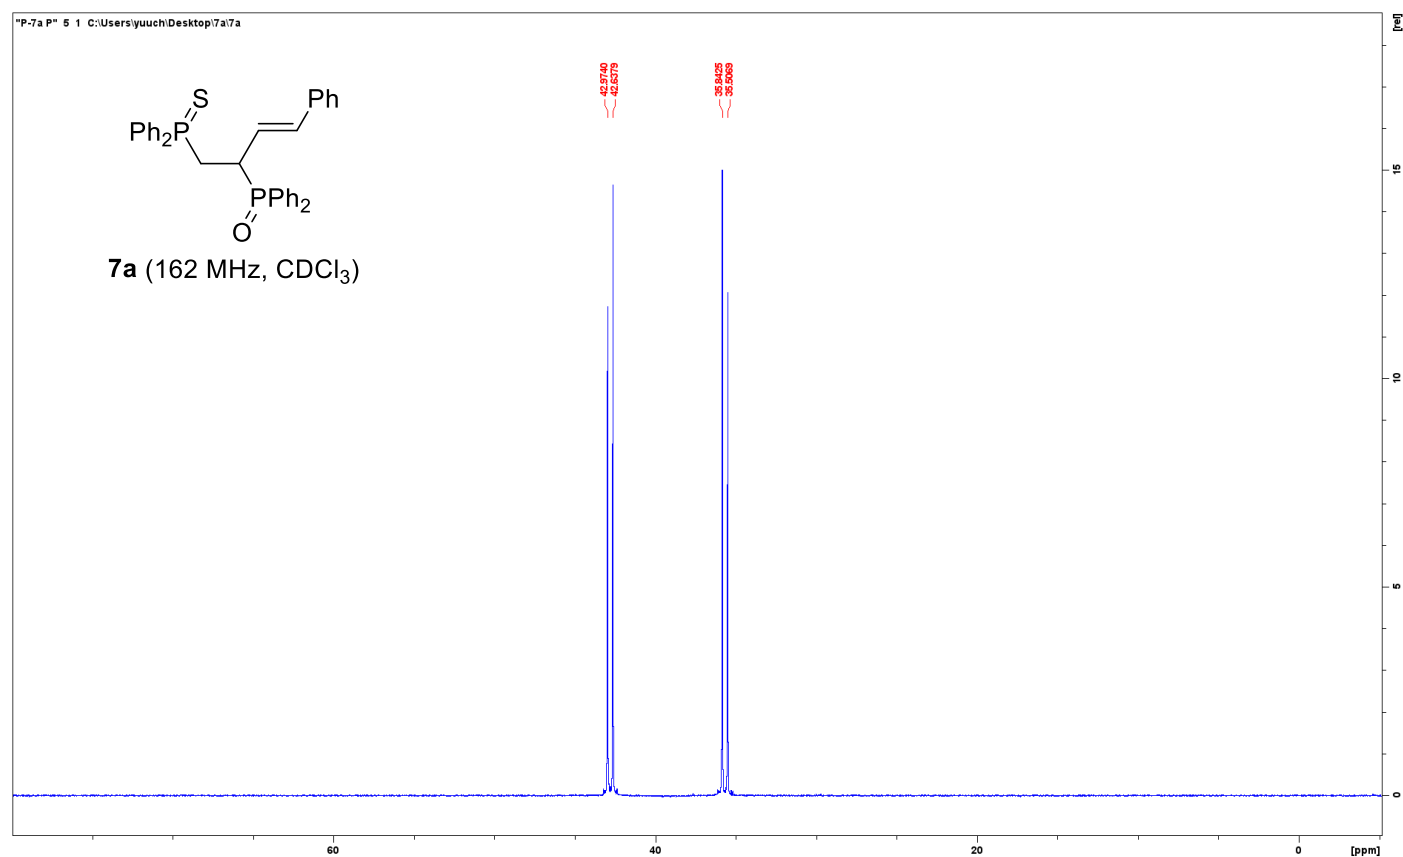

Supplement: s1 [file s1]
